# Supplementary material for: Crystalline Hydrogen Bond of Water Molecules Confined in a Metal-Organic Framework
Source: Research Square preprint supplement (doi:10.21203/rs.3.rs-1039370/v1), 2021-11-09

# checkCIF/PLATON report

You have not supplied any structure factors. As a result the full set of tests cannot be run.

THIS REPORT IS FOR GUIDANCE ONLY. IF USED AS PART OF A REVIEW PROCEDURE FOR PUBLICATION, IT SHOULD NOT REPLACE THE EXPERTISE OF AN EXPERIENCED CRYSTALLOGRAPHIC REFEREE.

No syntax errors found.      CIF dictionary      Interpreting this report

## Datablock: H2O-HK1st

---

Bond precision:    C-C = 0.0053 Å                      Wavelength=0.63000

Cell:                      a=26.275(3)              b=26.275(3)              c=26.275(3)  
                                alpha=90              beta=90              gamma=90  
Temperature:              298 K

|                | Calculated               | Reported                |
|----------------|--------------------------|-------------------------|
| Volume         | 18140(6)                 | 18139(6)                |
| Space group    | F m -3 m                 | F m -3 m                |
| Hall group     | -F 4 2 3                 | -F 4 2 3                |
| Moiety formula | 2(C3 H1.10 Cu0.50 O2.05) | C18 H6 Cu3 O12 0.3(H2O) |
| Sum formula    | C6 H2.20 Cu O4.10        | C18 H6.60 Cu3 O12.30    |
| Mr             | 203.43                   | 610.25                  |
| Dx,g cm-3      | 0.894                    | 0.894                   |
| Z              | 48                       | 16                      |
| Mu (mm-1)      | 1.024                    | 1.025                   |
| F000           | 4800.0                   | 4800.0                  |
| F000'          | 4817.67                  |                         |
| h,k,lmax       | 36,36,36                 | 36,36,36                |
| Nref           | 1333                     | 1329                    |
| Tmin,Tmax      | 0.946,0.950              | 0.786,1.000             |
| Tmin'          | 0.946                    |                         |

Correction method= # Reported T Limits: Tmin=0.786 Tmax=1.000  
AbsCorr = EMPIRICAL

Data completeness= 0.997                      Theta(max)= 25.989

R(reflections)= 0.0638( 780)              wR2(reflections)= 0.1979( 1329)

S = 1.052                      Npar= 38

---

The following ALERTS were generated. Each ALERT has the format  
**test-name\_ALERT\_alert-type\_alert-level.**  
 Click on the hyperlinks for more details of the test.

---

### Alert level A

PLAT601\_ALERT\_2\_A Unit Cell Contains Solvent Accessible VOIDS of . 11317 Ang\*\*3

**Author Response:** This crystal have exposed into very small amount of water mist. It has observed that the unit cell contains large accesible voids in the crystal during the sturcture analysis. However, the structure solvent of water molecule have not fully occupied in the voids and it has still a large voids.

---

### Alert level B

RINTA01\_ALERT\_3\_B The value of Rint is greater than 0.18  
 Rint given 0.193

**Author Response:** The crystal was very small and weakly diffracting even after prolonged exposure time from challenging sample. However, the structure was determined and refined properly.

PLAT049\_ALERT\_1\_B Calculated Density Less Than 1.0 gcm-3 ..... 0.8939 Check

**Author Response:** Large voids account for the low density of the structure.

---

### Alert level G

FORMU01\_ALERT\_1\_G There is a discrepancy between the atom counts in the  
     \_chemical\_formula\_sum and \_chemical\_formula\_moiety. This is  
     usually due to the moiety formula being in the wrong format.  
     Atom count from \_chemical\_formula\_sum: C18 H6.6 Cu3 O12.3  
     Atom count from \_chemical\_formula\_moiety:C18 H8 Cu3 O121.3

ABSMU01\_ALERT\_1\_G Calculation of \_exptl\_absorpt\_correction\_mu  
     not performed for this radiation type.

|                                                                    |              |
|--------------------------------------------------------------------|--------------|
| PLAT002_ALERT_2_G Number of Distance or Angle Restraints on AtSite | 2 Note       |
| PLAT003_ALERT_2_G Number of Uiso or Uij Restrained non-H Atoms ... | 1 Report     |
| PLAT004_ALERT_5_G Polymeric Structure Found with Maximum Dimension | 3 Info       |
| PLAT013_ALERT_1_G N.O.K. _shelx_hkl_checksum Found in CIF .....    | Please Check |
| PLAT019_ALERT_1_G _diffrn_measured_fraction_theta_full/*_max < 1.0 | 0.997 Report |
| PLAT020_ALERT_3_G The Value of Rint is Greater Than 0.12 .....     | 0.193 Report |
| PLAT042_ALERT_1_G Calc. and Reported Moiety Formula Strings Differ | Please Check |
| PLAT045_ALERT_1_G Calculated and Reported Z Differ by a Factor ... | 3.00 Check   |
| PLAT092_ALERT_4_G Check: Wavelength Given is not Cu,Ga,Mo,Ag,In Ka | 0.63000 Ang. |
| PLAT172_ALERT_4_G The CIF-Embedded .res File Contains DFIX Records | 1 Report     |
| PLAT173_ALERT_4_G The CIF-Embedded .res File Contains DANG Records | 1 Report     |
| PLAT177_ALERT_4_G The CIF-Embedded .res File Contains DELU Records | 1 Report     |
| PLAT178_ALERT_4_G The CIF-Embedded .res File Contains SIMU Records | 1 Report     |
| PLAT186_ALERT_4_G The CIF-Embedded .res File Contains ISOR Records | 1 Report     |
| PLAT300_ALERT_4_G Atom Site Occupancy of O1W Constrained at        | 0.1 Check    |
| PLAT300_ALERT_4_G Atom Site Occupancy of H1O1 Constrained at       | 0.1 Check    |
| PLAT301_ALERT_3_G Main Residue Disorder .....(Resd 1 )             | 3% Note      |
| PLAT720_ALERT_4_G Number of Unusual/Non-Standard Labels .....      | 1 Note       |

|                   |                                                  |   |             |
|-------------------|--------------------------------------------------|---|-------------|
| PLAT860_ALERT_3_G | Number of Least-Squares Restraints .....         | 9 | Note        |
| PLAT883_ALERT_1_G | No Info/Value for _atom_sites_solution_primary . |   | Please Do ! |
| PLAT933_ALERT_2_G | Number of OMIT Records in Embedded .res File ... | 3 | Note        |

---

1 **ALERT level A** = Most likely a serious problem - resolve or explain  
2 **ALERT level B** = A potentially serious problem, consider carefully  
0 **ALERT level C** = Check. Ensure it is not caused by an omission or oversight  
23 **ALERT level G** = General information/check it is not something unexpected

8 ALERT type 1 CIF construction/syntax error, inconsistent or missing data  
4 ALERT type 2 Indicator that the structure model may be wrong or deficient  
4 ALERT type 3 Indicator that the structure quality may be low  
9 ALERT type 4 Improvement, methodology, query or suggestion  
1 ALERT type 5 Informative message, check

---

It is advisable to attempt to resolve as many as possible of the alerts in all categories. Often the minor alerts point to easily fixed oversights, errors and omissions in your CIF or refinement strategy, so attention to these fine details can be worthwhile. In order to resolve some of the more serious problems it may be necessary to carry out additional measurements or structure refinements. However, the purpose of your study may justify the reported deviations and the more serious of these should normally be commented upon in the discussion or experimental section of a paper or in the "special\_details" fields of the CIF. checkCIF was carefully designed to identify outliers and unusual parameters, but every test has its limitations and alerts that are not important in a particular case may appear. Conversely, the absence of alerts does not guarantee there are no aspects of the results needing attention. It is up to the individual to critically assess their own results and, if necessary, seek expert advice.

### Publication of your CIF in IUCr journals

A basic structural check has been run on your CIF. These basic checks will be run on all CIFs submitted for publication in IUCr journals (*Acta Crystallographica*, *Journal of Applied Crystallography*, *Journal of Synchrotron Radiation*); however, if you intend to submit to *Acta Crystallographica Section C* or *E* or *IUCrData*, you should make sure that full publication checks are run on the final version of your CIF prior to submission.

### Publication of your CIF in other journals

Please refer to the *Notes for Authors* of the relevant journal for any special instructions relating to CIF submission.

---

**PLATON version of 22/03/2021; check.def file version of 19/03/2021**

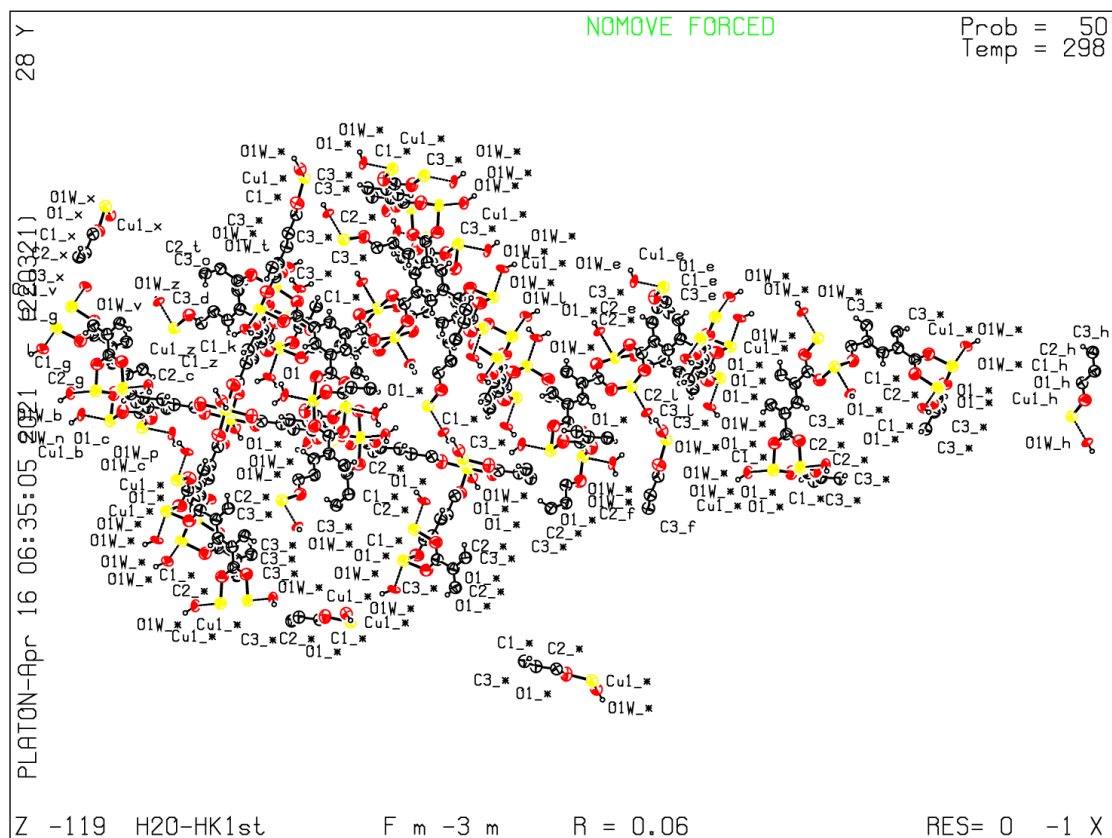

Supplement: Supplementary file 10 [file 93a8aaf31e7ec6c1b524f196.zip]
