# Supplementary material for: Crystalline Hydrogen Bond of Water Molecules Confined in a Metal-Organic Framework
Source: Research Square preprint supplement (doi:10.21203/rs.3.rs-1039370/v1), 2021-11-09

# checkCIF/PLATON report

You have not supplied any structure factors. As a result the full set of tests cannot be run.

THIS REPORT IS FOR GUIDANCE ONLY. IF USED AS PART OF A REVIEW PROCEDURE FOR PUBLICATION, IT SHOULD NOT REPLACE THE EXPERTISE OF AN EXPERIENCED CRYSTALLOGRAPHIC REFEREE.

No syntax errors found.      CIF dictionary      Interpreting this report

## Datablock: H2Oc-HK

---

Bond precision:    C-C = 0.0087 Å                      Wavelength=0.61000

Cell:                      a=26.210(3)              b=26.210(3)              c=26.210(3)  
                                alpha=90              beta=90              gamma=90  
Temperature:              220 K

|                | Calculated                               | Reported                             |
|----------------|------------------------------------------|--------------------------------------|
| Volume         | 18005(6)                                 | 18006(6)                             |
| Space group    | F m -3 m                                 | F m -3 m                             |
| Hall group     | -F 4 2 3                                 | -F 4 2 3                             |
| Moiety formula | 2(C3 H2 Cu0.50 O2.50),<br>4(H0.40 O0.20) | C18 H6 Cu3 O12 3(H2 O),<br>2.4(H2 O) |
| Sum formula    | C6 H5.60 Cu O5.80                        | C18 H16.80 Cu3 O17.40                |
| Mr             | 234.05                                   | 702.13                               |
| Dx,g cm-3      | 1.036                                    | 1.036                                |
| Z              | 48                                       | 16                                   |
| Mu (mm-1)      | 0.956                                    | 0.956                                |
| F000           | 5616.0                                   | 5616.0                               |
| F000'          | 5633.91                                  |                                      |
| h,k,lmax       | 36,36,36                                 | 36,36,36                             |
| Nref           | 1305                                     | 1296                                 |
| Tmin,Tmax      | 0.887,0.906                              | 0.834,1.000                          |
| Tmin'          | 0.887                                    |                                      |

Correction method= # Reported T Limits: Tmin=0.834 Tmax=1.000  
AbsCorr = EMPIRICAL

Data completeness= 0.993                      Theta(max)= 24.970

R(reflections)= 0.1220( 974)              wR2(reflections)= 0.3532( 1296)

S = 1.479                      Npar= 53

---

The following ALERTS were generated. Each ALERT has the format

**test-name\_ALERT\_alert-type\_alert-level.**

Click on the hyperlinks for more details of the test.

---

### Alert level A

PLAT601\_ALERT\_2\_A Unit Cell Contains Solvent Accessible VOIDS of . 5101 Ang\*\*3

**Author Response: This crystal have exposed a few minute under ambient air. It has observed that the unit cell contains large accesible voids in the crystal during the sturcture analysis. However, the structure solvent of water molecule have not fully occupied in the voids and it has still a large voids.**

---

### Alert level C

RINTA01\_ALERT\_3\_C The value of Rint is greater than 0.12  
Rint given 0.142  
PLAT020\_ALERT\_3\_C The Value of Rint is Greater Than 0.12 ..... 0.142 Report  
PLAT082\_ALERT\_2\_C High R1 Value ..... 0.12 Report  
PLAT084\_ALERT\_3\_C High wR2 Value (i.e. > 0.25) ..... 0.35 Report  
PLAT241\_ALERT\_2\_C High 'MainMol' Ueq as Compared to Neighbors of 01 Check  
PLAT242\_ALERT\_2\_C Low 'MainMol' Ueq as Compared to Neighbors of Cu1 Check  
PLAT260\_ALERT\_2\_C Large Average Ueq of Residue Including O2W 0.107 Check  
PLAT341\_ALERT\_3\_C Low Bond Precision on C-C Bonds ..... 0.00867 Ang.

---

### Alert level G

FORMU01\_ALERT\_1\_G There is a discrepancy between the atom counts in the  
\_chemical\_formula\_sum and \_chemical\_formula\_moiety. This is  
usually due to the moiety formula being in the wrong format.  
Atom count from \_chemical\_formula\_sum: C18 H16.8 Cu3 O17.4  
Atom count from \_chemical\_formula\_moiety: C18 H12.8 Cu3 O126.4  
ABSMU01\_ALERT\_1\_G Calculation of \_exptl\_absorpt\_correction\_mu  
not performed for this radiation type.  
PLAT002\_ALERT\_2\_G Number of Distance or Angle Restraints on AtSite 5 Note  
PLAT003\_ALERT\_2\_G Number of Uiso or Uij Restrained non-H Atoms ... 2 Report  
PLAT004\_ALERT\_5\_G Polymeric Structure Found with Maximum Dimension 3 Info  
PLAT013\_ALERT\_1\_G N.O.K. \_shelx\_hkl\_checksum Found in CIF ..... Please Check  
PLAT019\_ALERT\_1\_G \_diffrn\_measured\_fraction\_theta\_full/\*\_max < 1.0 0.994 Report  
PLAT042\_ALERT\_1\_G Calc. and Reported Moiety Formula Strings Differ Please Check  
PLAT045\_ALERT\_1\_G Calculated and Reported Z Differ by a Factor ... 3.00 Check  
PLAT092\_ALERT\_4\_G Check: Wavelength Given is not Cu,Ga,Mo,Ag,In Ka 0.61000 Ang.  
PLAT172\_ALERT\_4\_G The CIF-Embedded .res File Contains DFIX Records 2 Report  
PLAT173\_ALERT\_4\_G The CIF-Embedded .res File Contains DANG Records 2 Report  
PLAT177\_ALERT\_4\_G The CIF-Embedded .res File Contains DELU Records 1 Report  
PLAT178\_ALERT\_4\_G The CIF-Embedded .res File Contains SIMU Records 1 Report  
PLAT180\_ALERT\_4\_G Check Cell Rounding: # of Values Ending with 0 = 3 Note  
PLAT186\_ALERT\_4\_G The CIF-Embedded .res File Contains ISOR Records 2 Report  
PLAT300\_ALERT\_4\_G Atom Site Occupancy of O2W Constrained at 0.2 Check  
PLAT300\_ALERT\_4\_G Atom Site Occupancy of H1O2 Constrained at 0.2 Check  
PLAT300\_ALERT\_4\_G Atom Site Occupancy of H2O2 Constrained at 0.2 Check  
PLAT302\_ALERT\_4\_G Anion/Solvent/Minor-Residue Disorder (Resd 2 ) 100% Note  
PLAT417\_ALERT\_2\_G Short Inter D-H..H-D H1O1 ..H2O2 . 1.84 Ang.  
x,y,z = 1\_555 Check  
PLAT720\_ALERT\_4\_G Number of Unusual/Non-Standard Labels ..... 3 Note  
PLAT764\_ALERT\_4\_G Overcomplete CIF Bond List Detected (Rep/Expd) . 1.11 Ratio  
PLAT789\_ALERT\_4\_G Atoms with Negative \_atom\_site\_disorder\_group # 3 Check

|                   |                                                |       |   |      |             |
|-------------------|------------------------------------------------|-------|---|------|-------------|
| PLAT794_ALERT_5_G | Tentative Bond Valency for Cu1                 | (II)  | . | 2.22 | Info        |
| PLAT860_ALERT_3_G | Number of Least-Squares Restraints             | ..... |   | 18   | Note        |
| PLAT883_ALERT_1_G | No Info/Value for _atom_sites_solution_primary | .     |   |      | Please Do ! |
| PLAT933_ALERT_2_G | Number of OMIT Records in Embedded .res File   | ...   |   | 9    | Note        |

---

1 **ALERT level A** = Most likely a serious problem - resolve or explain  
0 **ALERT level B** = A potentially serious problem, consider carefully  
8 **ALERT level C** = Check. Ensure it is not caused by an omission or oversight  
28 **ALERT level G** = General information/check it is not something unexpected

7 ALERT type 1 CIF construction/syntax error, inconsistent or missing data  
9 ALERT type 2 Indicator that the structure model may be wrong or deficient  
5 ALERT type 3 Indicator that the structure quality may be low  
14 ALERT type 4 Improvement, methodology, query or suggestion  
2 ALERT type 5 Informative message, check

---

It is advisable to attempt to resolve as many as possible of the alerts in all categories. Often the minor alerts point to easily fixed oversights, errors and omissions in your CIF or refinement strategy, so attention to these fine details can be worthwhile. In order to resolve some of the more serious problems it may be necessary to carry out additional measurements or structure refinements. However, the purpose of your study may justify the reported deviations and the more serious of these should normally be commented upon in the discussion or experimental section of a paper or in the "special\_details" fields of the CIF. checkCIF was carefully designed to identify outliers and unusual parameters, but every test has its limitations and alerts that are not important in a particular case may appear. Conversely, the absence of alerts does not guarantee there are no aspects of the results needing attention. It is up to the individual to critically assess their own results and, if necessary, seek expert advice.

### Publication of your CIF in IUCr journals

A basic structural check has been run on your CIF. These basic checks will be run on all CIFs submitted for publication in IUCr journals (*Acta Crystallographica*, *Journal of Applied Crystallography*, *Journal of Synchrotron Radiation*); however, if you intend to submit to *Acta Crystallographica Section C* or *E* or *IUCrData*, you should make sure that full publication checks are run on the final version of your CIF prior to submission.

### Publication of your CIF in other journals

Please refer to the *Notes for Authors* of the relevant journal for any special instructions relating to CIF submission.

---

**PLATON version of 22/03/2021; check.def file version of 19/03/2021**

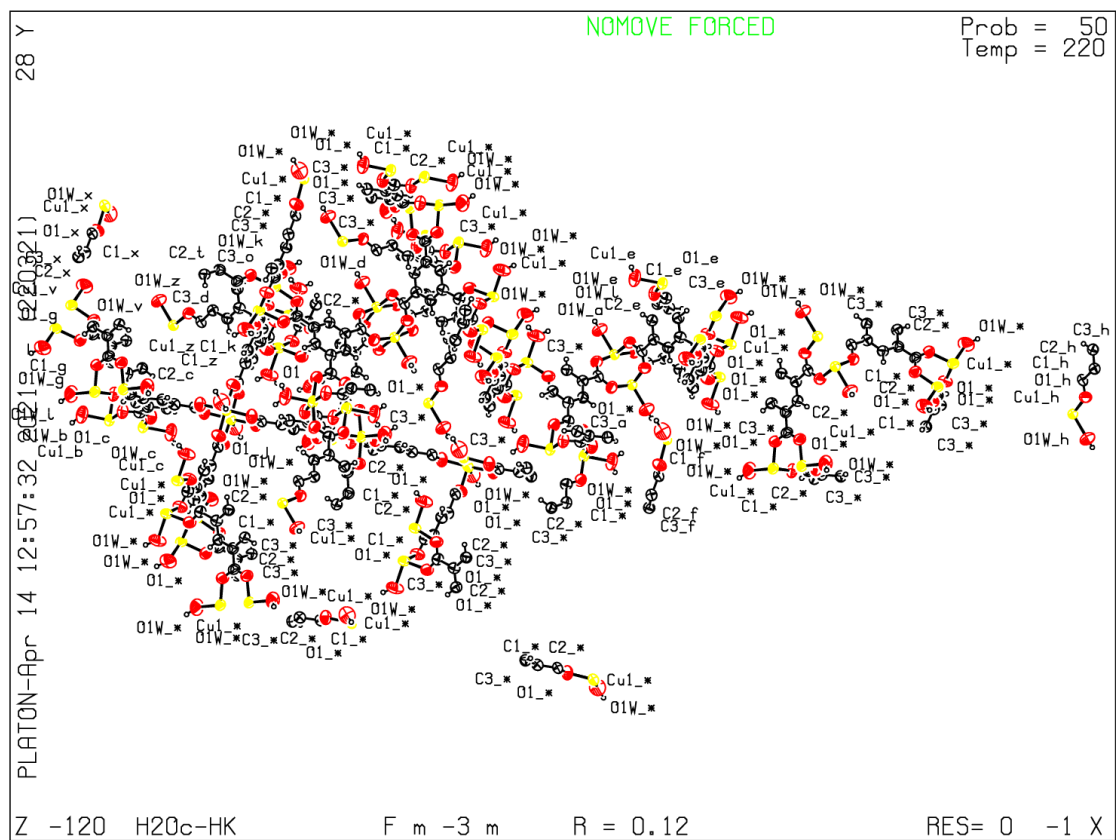

Supplement: Supplementary file 4 [file 93a8aaf31e7ec6c1b524f196.zip]
